1 **Single-Cell Transcriptomics reveals relaxed evolutionary constraint of spermatogenesis in**  
2 **two passerine birds as compared to mammals**

3 J. Carolina Segami<sup>1\*</sup> – [carolina.segami@ebc.uu.se](mailto:carolina.segami@ebc.uu.se) - ORCID: 0000-0002-9885-1537

4 Marie Semon<sup>2</sup> – [marie.semon@ens-lyon.fr](mailto:marie.semon@ens-lyon.fr) – ORCID: 0000-0003-3479-7524

5 Catarina Cunha – [cat.catarinacunha@gmail.com](mailto:cat.catarinacunha@gmail.com) – ORCID: 0000-0001-9038-2337

6 Claudia Bergin<sup>3</sup> – [claudia.bergin@icm.uu.se](mailto:claudia.bergin@icm.uu.se) – ORCID: 0000-0001-7960-1789

7 Carina F Mugal<sup>4</sup> - [carina.mugal@ebc.uu.se](mailto:carina.mugal@ebc.uu.se) – ORCID: 0000-0003-4220-4928

8 Anna Qvarnström<sup>1</sup> – [anna.qvarnstrom@ebc.uu.se](mailto:anna.qvarnstrom@ebc.uu.se) – ORCID: 0000-0002-1178-4053

9 <sup>1</sup>Department of Ecology and Genetics, Animal Ecology, Uppsala University, Uppsala, SE –  
10 75236, Sweden.

11 <sup>2</sup>Laboratory of Biology and Modeling of the Cell, Ecole Normale Supérieure de Lyon, CNRS,  
12 Inserm, UCBL, 69007, Lyon, France

13 <sup>3</sup>Science for Life Laboratory, Molecular Evolution, Uppsala University, Uppsala, SE – 75237,  
14 Sweden.

15 <sup>4</sup>Department of Ecology and Genetics, Evolutionary Biology, Uppsala University, Uppsala, SE  
16 – 75236, Sweden.

17 \*Corresponding author

18

19

20

21

22

23

24

25 **Abstract**

26 Spermatogenesis is a complex process where spermatogonia develop into haploid, mobile  
27 sperm cells. The genes guiding this process are subject to an evolutionary trade-off between  
28 preserving basic functions of sperm while acquiring new traits ensuring advantages in  
29 competition over fertilization of female gametes. In species with XY sex chromosomes, the  
30 outcome of this trade-off is found to vary across the stages of spermatogenesis but remains  
31 unexplored for species with ZW sex chromosomes. Here we characterize avian  
32 spermatogenesis at single cell resolution from testis of collared and pied flycatchers. We  
33 find evidence for relaxed evolutionary constraint of genes expressed in spermatocyte cells  
34 going through meiosis. An overrepresentation of Z-linked differentially expressed genes  
35 between the two species at this stage suggests that this relaxed constraint is associated with  
36 the lack of sex-chromosome silencing during meiosis. We conclude that the high throughput  
37 of bird spermatogenesis, at least partly, is explained by relaxed developmental constraint.

38

39

40

41

42

43

44

45

46

47

48

## 49 Introduction

50

51 Spermatogenesis, the biological process by which haploid sperm cells are created from  
52 diploid spermatogonia, is a highly complex process where at least seven somatic cell types  
53 and 26 morphologically distinct germ cell classes are involved<sup>1</sup>. Major chromatin remodeling  
54 occurs during spermatogenesis such as programmed double strand breaks, homologous  
55 recombination, chromosome synapsis, chromatin packing and chromosome inactivation<sup>2</sup>. As  
56 a result, the testis, where these processes occur, has the most complex transcriptome  
57 among all tissues including the brain<sup>3,4</sup>. Some of this complexity may be explained by the  
58 prevalent transcription occurring across large parts of the genome, which is thought to  
59 happen either as a none-adaptive side-effect of chromatin remodeling or as a mechanism of  
60 general “transcriptional scanning” that allow DNA repair<sup>3,5,6</sup>. However, the testis also  
61 harbors the highest number of tissue-specific expressed genes among all tissues in  
62 mammals, birds and insects<sup>7-11</sup>. A crucial question is to what extent genes with testis-  
63 specific expression reflect evolutionary innovations and species-specific differences in  
64 mating behaviors and sperm-egg interactions or are shared among divergent species and  
65 evolutionary constrained through effects of purifying natural selection to keep the complex  
66 process of spermatogenesis functional.

67

68 Analyses on the protein-coding sequences and transcription patterns show that testis-  
69 specific genes are among the most rapidly evolving genes<sup>12,13</sup> and that de-novo genes often  
70 appear in the testis<sup>13</sup>. In addition, testis size<sup>14,15</sup> and sperm morphology are astonishingly  
71 diverse among animal species<sup>16</sup>. This fast evolution is thought to be largely driven by sexual

72 selection, mainly through sperm competition<sup>17–19</sup> and cryptic female choice, the  
73 mechanisms by which females select the outcome of sperm competition<sup>20–24</sup>. Both these  
74 processes are post-copulatory events that occur when females have mated with multiple  
75 males, causing competition over fertilization success among ejaculates<sup>19,25</sup>.

76

77 The great diversity in spermatogenesis and sperm phenotypes across animal species may  
78 appear paradoxical in light of the central goal of this whole process being the same across  
79 species, i.e. to ensure the transmission of genetic material to the next generation. To  
80 achieve this goal, basic prerequisites always need to be fulfilled, including correct mitosis  
81 and meiosis and finally maturation of sperm cells that ensures their motility and ability to  
82 recognize and merge with the oocyte. Therefore the very basic processes of  
83 spermatogenesis are similar among different animals and there is evidence that the  
84 underlying genes are highly conserved<sup>26,27</sup>. Thus, spermatogenesis is subject to a  
85 combination of strong positive sexual selection through sperm competition and female  
86 cryptic choice as well as strong purifying natural selection to maintain central functions.

87

88

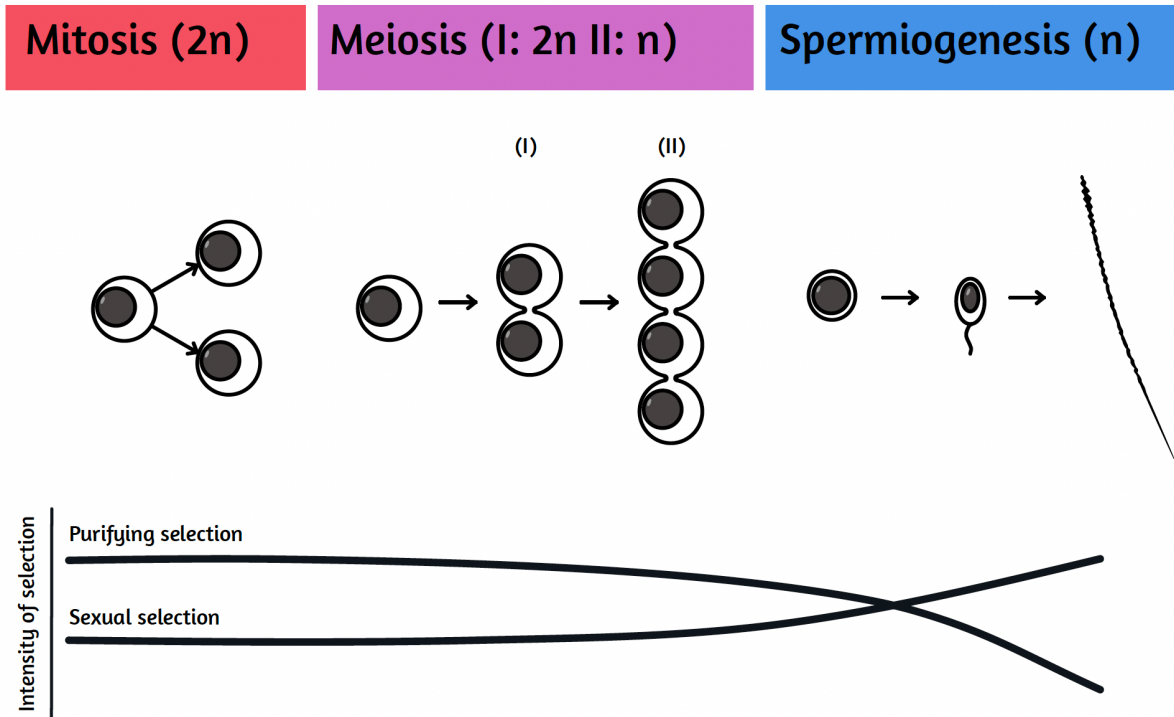

89

90 **Figure 1. Expected balance between positive sexual selection and purifying**

91 **natural selection across the different stages of spermatogenesis.**

92 *Spermatogenesis can for simplicity be divided into three stages. The first stage includes*

93 *several types of spermatogonia, where some cells are in constant mitotic activity to preserve*

94 *the basal number of cells in the spermatogonia population while others start to mature and*

95 *get ready for the next step. The second stage includes all cells that are in the different stages*

96 *of meiosis also known as spermatocytes. The third stage includes the haploid spermatids*

97 *(round spermatids and elongating spermatids). At this final stage, genes coding for sperm*

98 *traits that will define characteristics such as swimming ability, velocity and compatibility*

99 *with female reproductive fluid and female gametes, are expressed. Stages one and two are*

100 *suggested to be subject of strict control ensuring the correct respective cell divisions that*

101 *keep the whole process functional. By contrast, purifying selection on genes acting during*

102 *the last stage of spermatogenesis is suggested to be relatively relaxed and sexual selection*

103 *acting on sperm traits that affect success in sperm competition and/or are favored by cryptic*

104 *female choice to be strong.*

105

106 The balance between positive sexual selection and purifying natural selection affecting DNA  
107 sequences and gene expression is likely to differ between different stages of  
108 spermatogenesis (Figure 1). Genes expressed during the two first stages affect basic cell  
109 divisions and should be subject to strong purifying natural selection that prevents the  
110 spread of detrimental mutations<sup>28,29</sup> and the appearance of disruptive selfish elements such  
111 as transposons<sup>30</sup> and meiotic drivers<sup>31</sup>. The first stage, where there is a continuous mitotic  
112 proliferation of spermatogonia, is known to be very sensitive to mutations given the high  
113 number of mitotic cell divisions<sup>32</sup>. This aligns with the presence of strong purifying selection  
114 on both protein-coding genes and their regulatory elements that would benefit both  
115 spermatogenesis in males and cell proliferation and oogenesis in females (Figure 1). The  
116 genes underlying these early, basic stages in gamete production could potentially be subject  
117 to sex-specific selection since male fitness relies on fast production of many gametes (i.e.,  
118 stronger positive sexual selection) while female fitness is ensured through fewer gametes of  
119 higher quality (i.e., stronger purifying selection). However, sex-specific gene regulation  
120 provides resolutions to such intra-locus sexual conflicts by allowing the two sexes to express  
121 different optimal phenotypes<sup>33</sup>. While the mitotic divisions of the female germ cells only  
122 occur in the embryonic gonads and then enter meiosis during fetal development and stay  
123 arrested, mitotic proliferation continues postnatal in males and gametes are produced  
124 throughout life.

125

126 Spermiogenesis, the final stage of spermatogenesis should be more species-specific than the  
127 previous stages. We expect purifying selection on genes expressed during this final stage to

128 be relatively relaxed and sexual selection to be strong in the form of both sperm  
129 competition and cryptic female choice<sup>34</sup> (Fig 1). Because strong sexual selection acting on  
130 males may favor sperm traits in males that are detrimental for female fitness<sup>35</sup>, inter-locus  
131 sexual conflict could arise and speed up diversification<sup>36,37</sup>. With the increased use of single-  
132 cell RNA (scRNA) sequencing, we now have a better understanding of spermatogenesis,  
133 especially in mammalian and insect model organisms, all of them having XY sex determining  
134 systems<sup>13,38-42</sup>. This has allowed the identification of major germ and somatic cell types in  
135 the testis as well as the characterization of expression patterns throughout the different  
136 stages of spermatogenesis. It has thereby also become possible to study evolutionary  
137 aspects of spermatogenesis in greater detail. For example, comparisons between human,  
138 macaque and mouse showed conserved gene expression of spermatogonia and more  
139 diversification in the spermatid differentiation stage, which is consistent with relaxed  
140 purifying selection and/or increased sexual selection acting toward the later stages of  
141 spermatogenesis<sup>39,40</sup>. Taken together, previous theoretical and empirical studies in  
142 mammals and insects suggest faster adaptive evolution at the last stage of spermatogenesis.  
143  
144 The evolution of distinct male and female reproductive features are tightly intertwined with  
145 the evolution of sex chromosomes. A striking characteristics of mammalian spermatogenesis  
146 is that sex-chromosomes are inactivated during meiosis<sup>43</sup> and their transcription is  
147 repressed at the post-meiotic stage<sup>34</sup>. Comparisons between human, macaque and mouse  
148 have revealed consistency in sex-chromosome silencing during meiosis (MSCI), except for  
149 some escape genes in the case of primates<sup>39,40</sup>. Apart from a few genes that remain  
150 repressed post-meiotically, many X-linked testis-specific genes are highly expressed during  
151 this very last stages of spermatogenesis (spermiogenesis). These genes evolve fast and tend

152 to vary also among closely related species and may often be underlying the evolution of  
153 hybrid male sterility<sup>34,44</sup>.

154

155 Bird spermatogenesis, where spermatogenesis happens in the homogametic sex, is still  
156 poorly understood<sup>45</sup>, especially in passerines and has only been described  
157 morphologically<sup>45,46</sup> or using bulk RNA sequencing<sup>11</sup>. However, in order to understand the  
158 different stages of spermatogenesis, cell diversity composition and underlying evolutionary  
159 processes, a single cell approach is necessary<sup>10,38,42</sup>. This is particularly important for  
160 amniotes where the testis is composed of seminiferous tubules and multiple cell types and  
161 cell stages are mixed<sup>47</sup>.

162

163 While the general expectations for the balance between evolutionary forces acting on genes  
164 expressed during spermatogenesis are similar for birds and mammals, there may also be  
165 some specific constraints derived from the different types of sex determination systems.  
166 The expectation of relaxed purifying selection and increased sexual selection acting toward  
167 the later stages of spermatogenesis<sup>39,40</sup> is similar (Figure 1). However, since meiotic sex-  
168 chromosome inactivation (MSCI) is triggered by the absence of homologous sex-  
169 chromosome pairing partners in the heterogametic sex<sup>48</sup>, it does not apply to  
170 spermatogenesis in birds since males are the homogametic sex. Therefore, Z-linked testis-  
171 specific genes may be active during all stages of spermatogenesis in birds.

172

173 In this study we present a detailed molecular characterization of passerine spermatogenesis  
174 based on scRNA-seq of the testis of collared (*Ficedula albicollis*) and pied (*Ficedula*  
175 *hipoleuca*) flycatchers with the aim to reveal conserved and species-specific evolutionary



176 features of this central process. The two closely related species of flycatchers are widely  
177 used in studies on ecology and evolution<sup>49</sup> and male hybrids resulting from crosses between  
178 the two species are known to experience impaired sperm production<sup>50</sup>. There is also  
179 evidence for post-mating, pre-zygotic isolation<sup>51</sup>. These findings imply divergence in genes  
180 underlying spermatogenesis and make it possible for us to investigate conserved and  
181 diverged evolutionary features on a relatively short evolutionary time scale. We investigate  
182 the hypothesis of strongly conserved patterns of gene expression during the first stages of  
183 spermatogenesis and diverged features at the final stage in a ZW sex-determining system.  
184 Since our study is the first characterization of spermatogenesis at a single cell level for a ZW  
185 sex-determining system, an additional major goal is to assess the activity of the Z  
186 chromosome at the different stages of the process. We will also investigate whether Z-  
187 linked, testis-specific genes are more conserved or diverged at the different stages of  
188 spermatogenesis compared to testis-specific genes located on the autosomes.  
189  
190

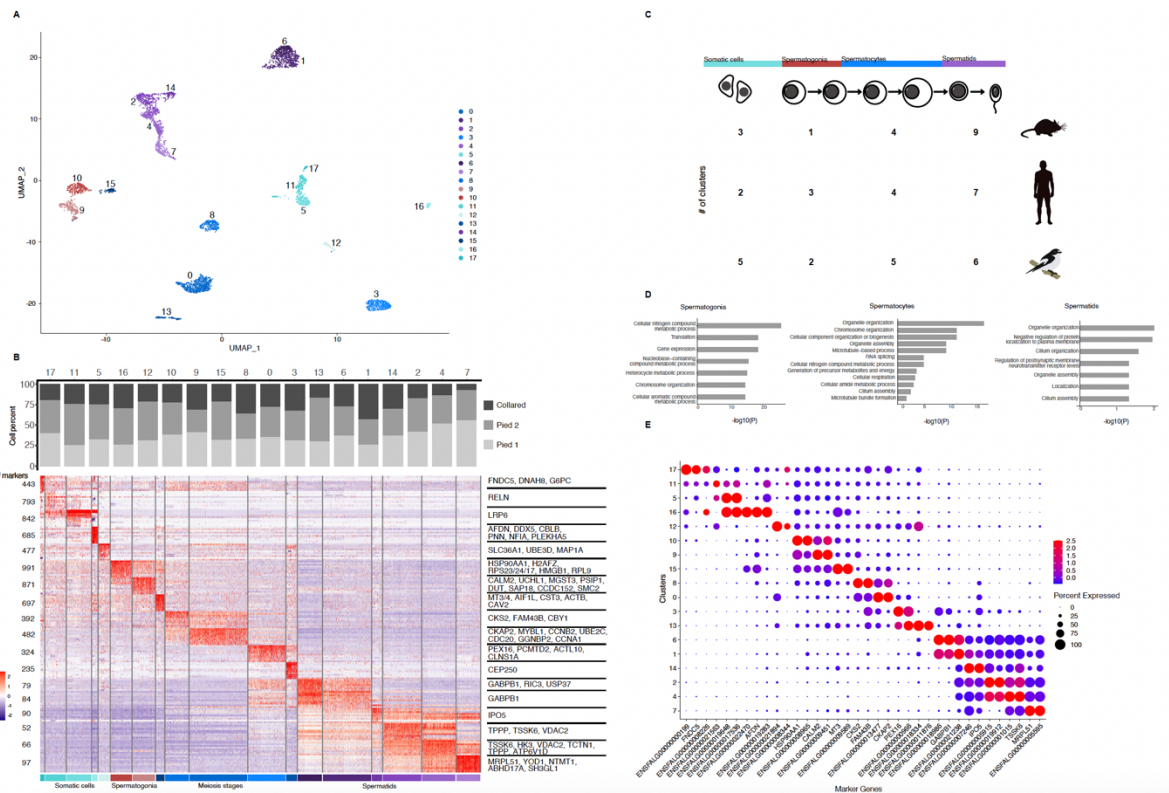

191

192 **Figure 2. Single cell RNA sequencing of testis samples from *Ficedula flycatchers* reveals 18**

193 **spermatogenesis cell types. (A) Visualization of consensus clustering of testis cells from 3**

194 **flycatcher individuals in UMAP (Uniform Manifold Approximation and Projection). (B)**

195 **Spermatogenesis cell cluster composition in terms of the percentage of cells from each testis**

196 **sample (i.e. individual bird) and heatmap showing the mean expression of each top 10**

197 **marker genes of the 18 cell types found. Representative makers with annotated function are**

198 **listed to the right and the total number of markers for each cluster are listed to the left side.**

199 **(C) Comparison of the number of clusters of testis cell types found in flycatchers, human and**

200 **mouse using a similar methodology (data from Hermann et al. 2018). (D) Representative GO**

201 **terms for the three main stages of spermatogenesis in flycatchers, with FDR-corrected p-**

202 **values shown for each GO term. (E) Subset of the best 2 or 3 markers specific to flycatchers**

203 **for each cluster, most of the markers lack functional annotation or do not have an ortholog**

204 **and therefore are shown with their Ensembl gene ID.**

## 205 **Results**

206

### 207 **Characterization of bird spermatogenesis**

208 Using the 10X genomics Chromium Single cell platform, we generated scRNA data from  
209 testis cell suspensions of two pied flycatchers and one collared flycatcher. After data pre-  
210 processing and cleaning, we recovered 4936 cells across our three samples that resulted in a  
211 consensus of 18 distinct clusters (Fig 2A) where each cluster contained cells from all three  
212 individuals (Fig 2B). We identified gene markers for each cluster, and a subset of the gene  
213 markers is shown in (Fig 2C, 2F) (Table S1). Most of the top cluster marker genes for  
214 flycatchers are not functionally annotated or do not have a corresponding ortholog in  
215 mammals. However, 65 representative flycatcher markers had unique orthologs in human  
216 and we found three genes that are also highlighted as important markers of different stages  
217 of spermatogenesis in mammals. A marker gene for undifferentiated spermatogonia,  
218 UCHL1, a pachytene marker, MYBL1, and an elongating spermatid marker, TSSK6 were  
219 found in mouse, human, macaque, and flycatchers. We also found several markers for  
220 mammalian spermatogenesis cell types that were expressed in our clusters of flycatcher  
221 spermatogenesis, (Fig S1, S2) and therefore were useful in the assessment of the identity of  
222 most of our clusters. Two of our 18 clusters were characterized as belonging to the initial  
223 stage of spermatogenesis (i.e. as spermatogonia), five to meiosis stages (i.e. spermatocytes)  
224 and six to the final stages of differentiating spermatids. In addition, five clusters were  
225 identified as somatic cells (Fig 2C). Among the markers indicative of clusters belonging to  
226 the somatic cells, we found mammalian markers for macrophages, sertoli cells, leydig cells  
227 and structural cells (Fig S2). Gene Ontology (GO) analysis based on the gene markers

228 showed relevant biological processes for all the three main stages of spermatogenesis (Fig  
229 2D). Consistent with this functional identification of clusters, velocity analysis and the PAGA  
230 graph obtained with ScVelo indicated a congruent order of the clusters with the main stages  
231 already identified (Fig 3). A general comparison of all markers from the three main stages  
232 with all the markers identified by Hermann et al., 2018 for mouse and humans, shows that  
233 the differentiating spermatids have significantly less shared markers between mammals and  
234 flycatchers than the first two stages ( $X^2$ -test with  $df = 2$ ,  $X^2 = 76.4$ ,  $p$ -value  $< 2.2e^{-16}$ ) (Table  
235 S2, S3) (Fig 4).  
236

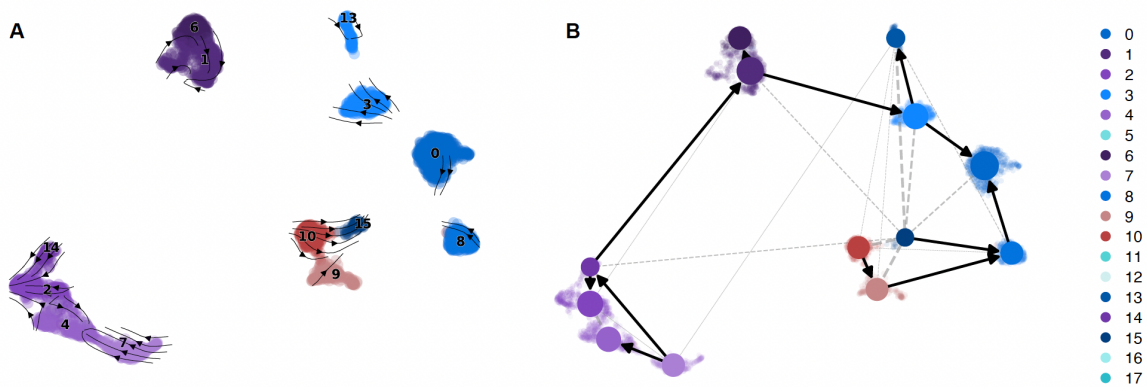

237  
238 **Figure 3 Trajectory of *Ficedula flycatcher* testis cells.** (A) Velocity dynamics of germline cell  
239 clusters. (B) PAGA graph of germline cell clusters, the arrows indicate connection strength  
240 and possible direction of differentiation.

241

## 242 Gene expression patterns

243 Excluding the somatic cell clusters and considering all expressed autosomal and Z-linked  
244 genes, we found a similar mean expression across the cell clusters (Fig 5A) (Table S4). At this  
245 last stage of spermatogenesis when spermatids are differentiating, the increase in variance

246 in gene expression is due to a very high expression of a few genes. Cluster 13 belonging to  
247 the meiosis stages, is the only cluster showing a pronounced tendency for a higher average  
248 expression of Z-linked genes with respect to the autosomal genes. When restricting the  
249 analysis to the top 500 expressed genes, we still find the pattern described above for cluster  
250 13, and that there is an increase in mean expression along the ordered timeline (Fig 5B).  
251

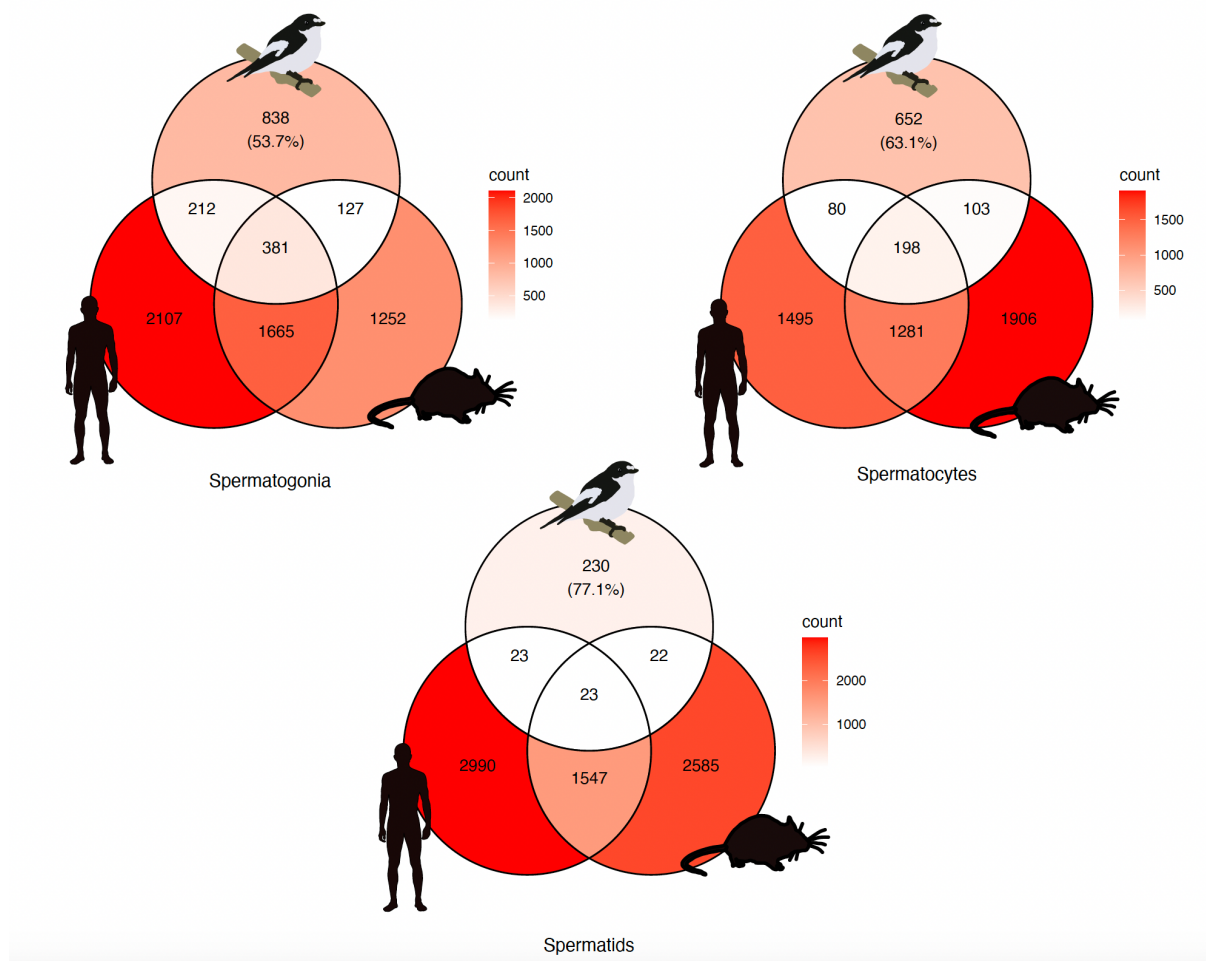

252

253 **Figure 4. Venn diagrams for the three main stages of spermatogenesis showing shared**  
254 **and private marker genes between flycatchers, human and mouse. The percentage in**  
255 **brackets corresponds to the percentage of private flycatcher markers. Spermatids share the**  
256 **least number of ortholog markers between flycatchers and either human or mouse as**  
257 **compared to the other stages of spermatogenesis.**

258

259 We also tested for an enrichment of Z-linked genes among the expressed genes in each  
260 cluster. When considering all genes with average expression > 0.01, we found a general  
261 trend of enrichment of Z-linked genes across all stages of spermatogenesis, but significant  
262 enrichment of Z-linked genes was only found for genes expressed in four somatic clusters,  
263 the two spermatogonia clusters, one meiosis cluster and two spermatid clusters (Fig 5C)  
264 (Table S5). This finding remains consistent for the two spermatogonia clusters and one  
265 somatic cluster when restricting the analysis to the top 500 genes (Fig 5D) (Table S6).

266

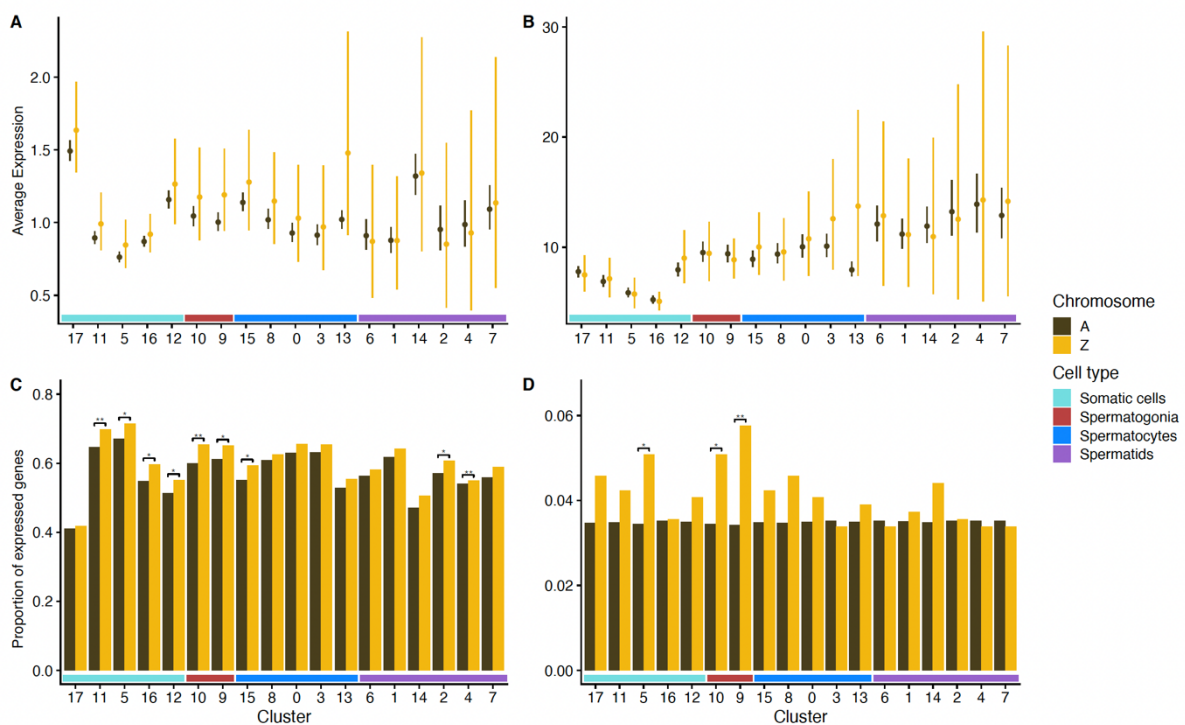

267

268 **Figure 5. Average expression and proportion of expressed genes across all 3 testis samples**

269 **from flycatchers for each cell clusters. Average expression of all genes located on the**

270 **autosomes or on the Z chromosome (A) For all expressed genes and (B) for the top 500**

271 **expressed autosomal and Z-linked genes. Error bars were obtained by bootstrapping. (C)**

272 **There is a significant enrichment of Z-linked genes expressed in four somatic clusters, two**

273 *spermatogonia clusters, one meiosis cluster and two spermatid clusters. For all genes with*  
274 *expression level >0.01. (D) There is a significant enrichment of Z-linked genes among the top*  
275 *500 genes expressed in one somatic cluster, and in two spermatogonia clusters.*

276

277

278 We calculated fold-change of gene expression for each cell cluster between the two  
279 flycatcher species using Wilcoxon rank sum test for differential expression (DE) analysis (Fig  
280 S3-S6) (Table S7). Very few or no genes were differentially expressed in the 5 clusters of  
281 somatic cells and in the two clusters of spermatogonia cells. Most DE genes were found in  
282 two clusters belonging to the meiosis stage and in five clusters belonging to the last stage of  
283 spermatogenesis. Of these, cluster 1 had the most DE genes of all clusters (i.e. 291 DE  
284 genes) (Fig 6A). Consistent with findings in species with XY sex determination, we thus find  
285 most differences in gene expression between the two species towards the later stages of  
286 spermatogenesis (generalized linear model with binomial distribution,  $1.63 \pm 0.07$ ,  $Z =$   
287  $25.14$ ,  $p$ -value  $< 2e^{-16}$ ) (Table S8). We tested for overrepresentation of Z-linked DE genes and  
288 found that one of the cell clusters going through meiosis (i.e. cluster zero) had a significant  
289 overrepresentation of DE genes on the Z chromosome (hypergeometric test,  $p=0.006$ )  
290 (Table 1). We lack statistical power to test for overrepresentation of Z-linked genes in cell  
291 clusters with few DE genes but most clusters with several DE genes show a tendency for  
292 overrepresentation of Z-linked genes (Fig 6A). We found significant GO terms among the DE  
293 genes in clusters belonging to meiosis and the final stage of spermatogenesis (i.e. cluster 0,  
294 3, 6, 1, 2 and 4) (Table S9). These GO terms were mainly related to cellular respiration and  
295 cell motility. Moreover, we found eleven DE genes located on the mitochondrial

296 chromosome, four autosomal genes that coded for mitochondrial proteins and two genes  
297 on the Z chromosome that also coded for mitochondrial genes (Table 2).  
298

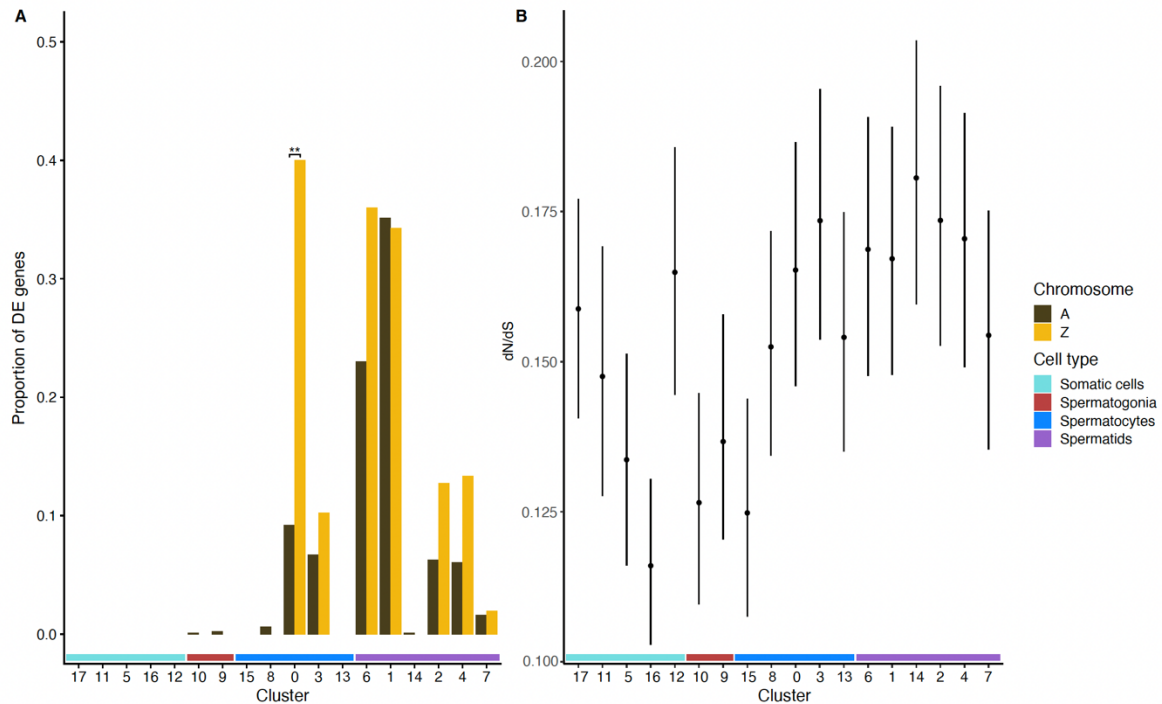

299

300 **Figure 6. Patterns of differential gene expression between the two flycatcher species**

301 **among the different testis cell clusters and signatures of gene sequence evolution. (A)**

302 *Proportion of DE genes between collared and pied flycatchers in each cluster. DE genes are*

303 *only found in clusters belonging to spermatogenesis, most of them are present in the meiosis*

304 *clusters and the spermiogenesis clusters. There is a general tendency for overrepresentation*

305 *of Z-linked genes among the DE genes between the two species. However, only*

306 *spermatocytes of Cluster 0 belonging to the meiosis stage show a significant*

307 *overrepresentation of Z-linked genes. (B)  $dN/dS$  mean value for the top 500 expressed genes*

308 *by cluster. There is an increase in  $dN/dS$  mean value along the spermatogenesis timeline*

309 *consistent with a higher constraint at the beginning of the process and relaxed constraint*

310 *towards the end.*



311

312

### 313 **Signatures of gene sequence evolution across the stages of spermatogenesis**

314

315 The average  $d_N/d_S$  values between collared and pied flycatchers for the genes expressed in  
316 the different cell clusters ranged from 0.1 to 0.2, which indicates that genes are on average  
317 evolving under constraint across all stages of spermatogenesis. However, the values are  
318 generally smaller, which is indicative of more constraint, for the somatic and for the first cell  
319 clusters, while the  $d_N/d_S$  values increase towards the end of the timeline, which is indicative  
320 of less constraint or an increasing contribution of positive selection (Figure 6B). These  
321 findings are hence indicative of stronger constraint on the initial spermatogonia stages of  
322 spermatogenesis and that the magnitude of purifying selection slightly relaxes toward the  
323 end of the timeline, or that there is positive selection acting on an increasing fraction of  
324 sites within the genes that are expressed during the final stages of spermatogenesis.

325

326

### 327 **Discussion**

328

329 Functional spermatogenesis is a pre-requisite for male fertility in sexually reproducing  
330 organisms, but has previously only been well characterized in a handful of model systems  
331 such as *Drosophila* and a few mammalian species<sup>13,38–40,42</sup>. In all these previously studied  
332 model systems males constitute the heterogametic sex, implying that some major  
333 evolutionary features are shared between them such as the regulatory constraints

334 associated with meiotic sex chromosome inactivation (MSCI) and post meiotic gene  
335 repression, which select against sex-linked meiotic genes. Based on scRNA-seq of the testis  
336 of two closely related passerine bird species, where males constitute the homogametic sex,  
337 we can reveal both, striking evolutionary similarities and differences, compared to previous  
338 findings based on the study systems with heterogametic males. One of our major goals was  
339 to characterize the relative average expression of Z-linked genes to autosomal genes along  
340 the different stages of spermatogenesis. We know from oogenesis in XY systems, which  
341 happens in the homogametic sex, that there is an absence of MSCI given that there are no  
342 unpaired chromosomes. However, before the moment of chromosome synapsis one of the  
343 normally silenced X chromosomes needs to be unsilenced causing a hyperexpression of the  
344 X chromosome (i.e. dosage decompensation)<sup>52</sup>. Birds have been found to have partial  
345 dosage compensation regulated on a gene-by-gene basis<sup>53,54</sup>. This is mainly evident in the  
346 heterogametic females where the Z:A ratio has been found to be  $< 1$  while homogametic  
347 males have a Z-linked average expression similar to the autosomes (i.e.  $Z:A \sim 1$ ).  
348 Nevertheless, we observe a high average expression of the Z chromosome with respect to  
349 the autosomes in one of the cell clusters belonging to meiosis (cluster 13; Fig 5A, 5B). This  
350 signal appears very similar to the moment in mammal oogenesis when the X chromosome is  
351 showing dosage decompensation during meiosis to enable the following chromosome  
352 synapsis<sup>52</sup>. Since we know that some genes on the Z chromosome show dosage  
353 compensation while others do not, it is possible that the signal we observe reflects  
354 decompensation of the compensated genes similarly to what happens during mammalian  
355 oogenesis.  
356  
357 In agreement with earlier studies investigating signals of molecular evolution across

358 different stages of spermatogenesis in mammals<sup>34,39,40,55</sup>, we find that the first stage of  
359 spermatogenesis shows several signs of strong evolutionary constraint. These signs include  
360 higher conservation of gene expression between the two flycatcher species at this stage  
361 compared to the later stages (Fig 6A), higher conservation of protein-coding sequences of  
362 genes expressed at this stage (Fig 6B), and more detected shared orthologous gene markers  
363 between flycatchers and mammals among the gene markers used to characterize the cell  
364 clusters (Fig 4). Like in mammals, we also find a significant enrichment of Z-linked genes in  
365 the two clusters of this stage<sup>55</sup>. All together these results reaffirm the prediction that basic  
366 processes such as mitotic cell division are highly conserved even among divergent taxa due  
367 to strong purifying selection to keep functionality.

368

369 During the second stage of spermatogenesis when the different steps of meiosis occur, we  
370 expected to find lesser constraint than the first stage of spermatogenesis. However, we find  
371 evidence of even lesser constraint than expected based on earlier observations in XY  
372 systems. Consistent with expectations, genes expressed in the second stage show lower  
373 conservation of protein-coding sequences compared to genes expressed in the first stage of  
374 spermatogenesis. However, two cell clusters belonging to the stages of meiosis contain an  
375 unexpected high proportion of genes that are differentially expressed between the two  
376 flycatcher species (Fig 6A). This result indicates that gene expression at this stage is less  
377 constraint by purifying natural selection and/or by intra-locus sexual conflict as compared to  
378 mammals. While this finding may be specific to the flycatcher system, given the absence of  
379 MSCI during male meiosis in ZW systems it could also be shared by other ZW species. In  
380 mammals, MSCI and post-meiotic repression of X-linked genes result in many testis-biased  
381 genes having been copied from the X chromosome to the autosomes.<sup>56-58</sup>. Alternatively, X-

382 linked testis-biased genes are highly expressed in earlier stages of spermatogenesis and the  
383 transcripts prevail until the final stage where its function is necessary<sup>59</sup>. By contrast, testis-  
384 biased genes can remain on the Z chromosome and be synthesized and expressed when  
385 needed in birds. We indeed find a significant signal of enrichment of Z-linked genes among  
386 the genes that were differentially expressed between the two flycatcher species during this  
387 second stage of spermatogenesis. While this result again may be specific for the flycatcher  
388 case, it is also consistent with relaxed constraint specifically associated with the absence of  
389 MSCI which is a universal feature for birds and all ZW systems. Studies of additional species,  
390 where spermatogenesis happens in the homogametic sex, are needed to provide a broader  
391 picture. Nevertheless, since male fitness relies on fast production of many gametes, we  
392 suggest that this relief of constraint may potentially explain why bird spermatogenesis is  
393 four times faster compared to spermatogenesis in mammals.

394

395 As predicted, the third and last stage of spermatogenesis in the flycatchers shows even  
396 more clear signs consistent with relaxed purifying natural selection and/or strong positive  
397 sexual selection than the second stage. Protein-coding sequence divergence of genes  
398 expressed in the last stage is on average highest among all stages and we find a significantly  
399 higher proportion of DE genes between the two flycatcher species both in terms of number  
400 of DE genes and in terms of number of cell clusters with DE genes. In agreement with what  
401 has been described for mammals we also find more private markers at this stage and  
402 overall, less genes, for which one-to-one orthologs to mammals could be identified. One  
403 possible explanation for this observation is the presence of more de novo genes that are  
404 species-specific at this stage, similar to what has been found among macaque, human and  
405 mouse<sup>40</sup>. During this last stage of spermatogenesis, when the sperm cells obtain traits that

406 influence swimming ability and other important functions known to affect success in sperm  
407 competition and cryptic female choice, a relatively high degree of expression of sex  
408 chromosome linked genes is expected<sup>34</sup>. This is because sex chromosomes are in general  
409 known to accumulate genes with sex-biased functions<sup>60</sup>. Since the Z-chromosome spends  
410 most of its time in males, the fixation of Z-linked mutations with male-biased fitness  
411 functions are expected to be favored by positive sexual selection<sup>61-64</sup>. There were  
412 tendencies for enrichment of expressed Z-linked genes both among all the clusters at this  
413 stage and among the DE genes between the two species of flycatchers. These findings are  
414 consistent with evidence of an overall elevated sequence and expression divergence of Z-  
415 linked genes compared to the autosomal genes in flycatchers<sup>11,65</sup> and in other birds<sup>63,66</sup>.  
416 However, fast evolution of Z-linked genes can aside from positive sexual selection also be  
417 caused by genetic drift in combination with a higher mutation rate in males<sup>67,68</sup>. The  
418 observed tendency for Z-chromosome enrichment of expression divergence associated with  
419 the last stage of spermatogenesis could therefore also reflect relaxed purifying selection  
420 instead of increased positive sexual selection. However, across the two last stages of  
421 spermatogenesis, we find several significant GO terms for biological processes among the  
422 DE genes between the two flycatcher species that are mainly related to cellular respiration  
423 and cell motility. The presence of GO terms related to cell motility reinforces the idea that  
424 sexual selection related to sperm performance has an important effect on the fast evolution  
425 of genes coding for these traits at the final stage of spermatogenesis. Since F1 hybrids  
426 resulting from crosses between collared and pied flycatchers experience hybrid dysfunction  
427 in terms of severely reduced fertility<sup>50</sup> and in terms of elevated metabolic rate<sup>69</sup>, our results  
428 add to previous evidence suggesting that mito-nuclear incompatibilities may be causing or  
429 contributing to such dysfunction.

430

431 There are some major similarities between XY and ZW systems in terms of the selection  
432 pressures acting at the different stages of spermatogenesis with strong purifying selection  
433 during the first stage of spermatogenesis and sexual selection or relaxed purifying selection  
434 during the final stage. However, a major difference is the developmental constraint that  
435 heterogametic males experience in XY systems that males in ZW systems lack. This lack of  
436 constraint in theory allows the Z chromosome to keep testis-biased genes that also may  
437 include genes with sexually antagonistic fitness effects. We detect signals of fast evolving Z-  
438 linked genes expressed not only during the last stage of spermatogenesis but also already at  
439 the second stage thereby revealing a possible key evolutionary difference between this  
440 process in birds and mammals. We suggest that the high throughput of bird  
441 spermatogenesis, which is four times faster compared to mammals<sup>70</sup>, at least partly is  
442 explained by relief of evolutionary constraint, possibly also connected to an advantage in  
443 the intra-locus sexual conflict considering the optimal solution to the trade-off between  
444 gamete number and quality. Our study is the first characterization of spermatogenesis at a  
445 single cell level for a ZW system and it thereby opens the doors for future studies exploring  
446 various aspects of spermatogenesis in ZW systems such as infertility, molecular evolution  
447 and sex-chromosome evolution.

448

449

## 450 **Methods**

### 451 **Sample collection, cell suspension preparation and sequencing**

452

453 Two pied flycatcher (*Ficedula hypoleuca*) and one collared flycatcher (*Ficedula albicollis*)  
454 males were sampled from the monitored populations on Öland (57°100N, 16°580E),  
455 Sweden<sup>49</sup> in May of 2019. The individuals were trapped in nest boxes while defending  
456 territories before nest building at the beginning of the breeding season. These birds were  
457 briefly kept in outdoor aviaries and then transported in individual cages over night to our lab  
458 facilities at Uppsala University. By choosing this timing during the breeding season, we  
459 ensured that the individuals possessed fully functional testis, because the testis degenerates  
460 once the reproductive season is over in this species. The animals were sacrificed and  
461 immediately dissected. All animal handling was done following Swedish regulations with the  
462 required permits approved.

463 The testes were placed in a cold petri dish with PBD BSA buffer, cleaned from any other  
464 visible tissue cells and cut in half. A half of testis tissue was then put in 3ml of buffer PBD  
465 BSA and dissociated by mechanical dissociation using the gentleMACS Dissociator (Miltenyi  
466 Biotech, Bergisch Gladbach, Germany) with the gentleMACS C Tubes using the preset for  
467 mouse spleen as recommended by the manufacturer. Next, the cell suspension was  
468 centrifuged to assure all cells would get down the cap and the walls of the tube. Finally, the  
469 cell suspension was homogenized by pipetting and filtered using a cell strainer of 70( $\mu$ m).

470

471 After mechanical dissociation, an aliquote of the cell suspension was stained with propidium  
472 iodide and Hoechst for live death cell staining, examined under the microscope, and cell  
473 viability was estimated to be at least 80%. Cells were counted using a Neubauer chamber  
474 and the cell suspension was then diluted to achieve the required concentration of  $1 \times 10^6$   
475 cell/ml. The final cell suspension of a total volume of 500  $\mu$ l was immediately delivered to  
476 the sequencing platform for library preparation with 10X genomics Chromium Single Cell 3'

477 v3 kit for scRNAseq. The whole process between sacrificing the animals and handing in the  
478 final cell suspension, lasted 2 to 3 hours during which the samples were kept on ice at all  
479 times. The 3 libraries were sequenced in one NovaSeq SP flow cell, yielding an approximate  
480 of 215 million reads per sample.

481

## 482 **Data processing and analysis**

483

484 We created a custom reference for cell counting using the 10x Genomics Cell Ranger v.  
485 4.0.0.<sup>71</sup> command mkref following default settings and the well documented CellRanger  
486 pipeline. For that, we used the publicly available genome .fasta file (v. 1.4) of the collared  
487 flycatcher and the collared flycatcher annotation .gtf file from *Ensembl* (v. 1.4). Count  
488 matrixes for every gene in each individual cell for the three samples were obtained. Using  
489 this output and the .gtf file, a .loom file was generated for each of the three samples using  
490 the command run10x from the python package Velocity v. 0.17.17<sup>72</sup>. Finally, this file was  
491 exported to Seurat v. 3.2.0<sup>73</sup> for filtering, normalization and clustering (described below).

492

## 493 **Filtering, normalization and clustering**

494 The three .loom files were imported to R, transformed to Seurat objects and then merged to  
495 a single object. We filtered out all cells with less than 200 features and more than 2500  
496 features as well as cells with less than 5% of mitochondrial genes. The normalization was  
497 done using anchors to integrate the 3 samples and SCTransform as documented in the  
498 Seurat pipeline. Finally, we followed the standard Seurat workflow for clustering using  
499 UMAP (Uniform Manifold Approximation and Projection). Because spermatogenesis is a  
500 continuous non-discrete process, we obtained a big cluster containing a heterogenous cell



501 composition with no clear gene markers, therefore that cluster was excluded. The remaining  
502 cells were re-clustered.

503

504 Marker genes for each cluster were identified using the Seurat function FindAllMarkers. The  
505 default setting uses the Wilcoxon rank sum test and calculates average log fold change for  
506 each gene between the clusters. We also found all markers using the ROC standard AUC  
507 classifier method, most of which were the same as the markers found with Wilcoxon rank  
508 sum test. We selected the top 3 best markers for each cluster having the highest AUC value  
509 Figure 2 F.

510

#### 511 **Characterization of the cell clusters**

512 We searched for the presence of all the previously identified markers for the different  
513 spermatogenesis stages in human<sup>38,41</sup>, mouse<sup>38,42</sup> and macaque<sup>39,40</sup> in our flycatcher cell  
514 clusters. By crossing the information of the previously identified markers found in our data  
515 we assigned identities to the cell clusters to the four major groups of cells found in  
516 spermatogenesis: Spermatogonia cells, meiotic cells, differentiating spermatid cells and  
517 somatic cells.

518

#### 519 **Gene Ontology analysis**

520 We performed a Gene Ontology (GO) enrichment analysis for biological processes using the  
521 webtool ShinyGO v.0741<sup>74</sup> with the collared flycatcher as a background. To remove  
522 redundant and/or nested GO terms we used the web tool REVIGO<sup>75</sup>. This analysis was done  
523 per cluster using all identified markers and afterwards per cluster using all the differentially  
524 expressed (DE) genes (see below).

525

## 526 **Velocity analysis**

527 To confirm the identity of the clusters with another analysis and infer the most likely time  
528 trajectory, we used the python package scVelo<sup>76</sup> to run velocity analysis, pseudotime  
529 analysis and a PAGA (Partition-based graph abstraction) graph<sup>77</sup>. With that purpose we  
530 exported our Seurat object to .h5dr format compatible with scVelo and followed their well-  
531 documented pipeline.

532

533 Once all our clusters were assigned to one of the main stages of spermatogenesis, we  
534 performed a comparison with mouse and human using one to one orthologs. We  
535 downloaded the complete list of markers found by Hermann et al. for mouse and human  
536 and we grouped the clusters in the three main stages of spermatogenesis and identified the  
537 shared markers among flycatchers, mouse and human. The shared markers were displayed  
538 using Venn plots.

539

## 540 **Gene expression patterns at different stages of spermatogenesis**

541 We calculated average expression of all genes per cell cluster for our merged object using  
542 the AverageExpression function after using the LogNormalize function in the RNA counts  
543 matrix. Then we added as metadata the location of each gene, either on the autosomes or  
544 on the Z chromosomes. We subset the data to all genes expressed and to the top 500  
545 expressed genes, respectively, and performed a bootstrap resampling with replacement to  
546 generate confidence intervals. To test for enrichment of Z-linked genes in each cluster we  
547 performed a hypergeometric test for over-representation using the R function phyper and  
548 lower tail false.

549

## 550 **Molecular signatures of evolution throughout the cell clusters**

551 The  $d_N/d_S$  ratio per cluster was computed as the ratio of average  $d_N$  and average  $d_S$  for the  
552 top 500 expressed genes based on collared flycatcher specific  $d_N$  and  $d_S$  values<sup>78</sup>. We subset  
553 outlier genes having a  $d_S > 1$  and  $d_N/d_S > 2$ . Finally, we performed a bootstrap resampling to  
554 generate confidence intervals.

555 We used the metadata of species in our Seurat object to perform the comparison of gene  
556 expression at the different stages of spermatogenesis between the two species of  
557 flycatchers. The function FindMarkers was used to perform a Wilcoxon rank sum test to  
558 calculate average fold change and find DE genes between the two flycatcher species within  
559 each cluster. We used the adjusted  $p$ -value with a threshold of 0.05 for significance of  
560 average fold change. In order to visualize the DE genes, volcano plots were computed using  
561 the package enhanced volcano. We performed a hypergeometric test on the DE genes of  
562 each cluster to test for over-representation of Z-linked genes using the R function phyper.  
563 To test whether there was a significant difference of DE genes between the stages, we  
564 implemented a generalized linear model with binomial distribution of the response variable.  
565 We used the cbind function to consider DE genes or non-DE genes as binary response  
566 variable and we used spermatogenesis stage as explanatory variable. Finally, we performed  
567 a GO analysis on the DE genes using the same methods described above.

568

569

## 570 **Author Contributions**

571 AQ and JCS conceived the study. AQ, JCS and CC collected the samples. JCS sacrificed the  
572 birds. CC performed the dissections. JCS, CC and CB adapted and carried out the cell

573 suspension protocol. JCS and MS performed the single cell clustering and bioinformatics  
574 analysis. JCS, MS and CFM performed and discussed the molecular evolution and statistical  
575 analysis. JCS, MS, CFM and AQ discussed and interpreted all the results. JCS and AQ wrote  
576 the manuscript. All authors commented and approved the final version of the manuscript.  
577

## 578 **Acknowledgements**

579 We are thankful for help during the collection of the data and/or the development of the  
580 manuscript to William Jones, Katerina Guschanski, Tom van der Valk, David Weatcroft,  
581 Mahvash Jami, Javier Florenza García and all Qvarnström lab field assistants. We also thank  
582 the Microbial Single Cell Genomics Facility at SciLifeLab for help developing the cell  
583 suspension protocol and for letting us use their lab facilities. Sequencing was performed by  
584 the SNP&SEQ Technology Platform in Uppsala. The facility is part of the National Genomics  
585 Infrastructure (NGI) Sweden and Science for life Laboratory. The SNP&SEQ Platform is also  
586 supported by the Swedish Research Council and the Knut and Alice Wallenberg Foundation.  
587 Computations were performed on resources provided by the Swedish National  
588 Infrastructure for Computing (SNIC) at Uppsala Multidisciplinary Center for Advanced  
589 Computational Science (UPPMAX). Funding: This work was supported by the Swedish  
590 Research Council, grant number 2016–05138 and 2012–03722 to AQ. CFM is funded by  
591 grants to Hans Ellegren from the Swedish Research Council (2013/08271) and Knut and Alice  
592 Wallenberg Foundation. MS is funded by IUF (Institut Universitaire de France) and ANR 21 T-  
593 ERC PLEIOTROPY and received a stipend from Wenner-Gren for a sabbatical at Uppsala  
594 University.

595

## 596 **Ethical permits**

597 Permit for keeping flycatchers in aviaries and sacrificing maximum 17 flycatchers per year.

598 Swedish environmental protection agency Natur vårds verket (NV-01203-18) valid from

599 2018-05-01 till 2019-06-30.

600

601 **Competing interests:** There are no competing interests.

602 **Data availability:** All data and code will be available in a public repository (pending).

603

#### 604 **Bibliography**

605 1. Hess, R. A. & De Franca, L. R. Spermatogenesis and cycle of the seminiferous

606 epithelium. *Adv. Exp. Med. Biol.* **636**, 1–15 (2008).

607 2. Ernst, C., Eling, N., Martinez-Jimenez, C. P., Marioni, J. C. & Odom, D. T. Staged

608 developmental mapping and X chromosome transcriptional dynamics during mouse

609 spermatogenesis. *Nat. Commun.* **10**, 1251 (2019).

610 3. Soumillon, M. *et al.* Cellular Source and Mechanisms of High Transcriptome

611 Complexity in the Mammalian Testis. *Cell Rep.* **3**, 2179–2190 (2013).

612 4. Gamble, J. *et al.* An expanded mouse testis transcriptome and mass spectrometry

613 defines novel proteins. *Reproduction* **159**, 15–26 (2020).

614 5. Xia, B. *et al.* Widespread Transcriptional Scanning in the Testis Modulates Gene

615 Evolution Rates. *Cell* **180**, 248-262.e21 (2020).

616 6. Xia, B. & Yanai, I. Gene expression levels modulate germline mutation rates through

617 the compound effects of transcription-coupled repair and damage. *Hum. Genet.* 1–12

618 (2021). doi:10.1007/s00439-021-02355-3

619 7. Parisi, M. *et al.* A survey of ovary-, testis-, and soma-biased gene expression in

620 *Drosophila melanogaster* adults. *Genome Biol.* **5**, R40 (2004).

- 621 8. Djureinovic, D. *et al.* The human testis-specific proteome defined by transcriptomics  
622 and antibody-based profiling. *Mol. Hum. Reprod.* **20**, 476–488 (2014).
- 623 9. Uhlen, M. *et al.* Tissue-based map of the human proteome. *Science (80-. ).* **347**,  
624 1260419–1260419 (2015).
- 625 10. Jung, M. *et al.* Unified single-cell analysis of testis gene regulation and pathology in  
626 five mouse strains. *Elife* **8**, (2019).
- 627 11. Mugal, C. F. *et al.* Tissue-specific patterns of regulatory changes underlying gene  
628 expression differences among *Ficedula* flycatchers and their naturally occurring F1  
629 hybrids. *Genome Res.* **31**, 1727–1739 (2020).
- 630 12. Brawand, D. *et al.* The evolution of gene expression levels in mammalian organs.  
631 *Nature* **478**, 343–348 (2011).
- 632 13. Witt, E., Benjamin, S., Svetec, N. & Zhao, L. Testis single-cell RNA-seq reveals the  
633 dynamics of de novo gene transcription and germline mutational bias in *Drosophila*.  
634 *Elife* **8**, (2019).
- 635 14. MacLeod, C. D. & MacLeod, R. C. The relationship between body mass and relative  
636 investment in testes mass in amniotes and other vertebrates. *Oikos* **118**, (2009).
- 637 15. Baker, J., Humphries, S., Ferguson-Gow, H., Meade, A. & Venditti, C. Rapid decreases  
638 in relative testes mass among monogamous birds but not in other vertebrates. *Ecol.*  
639 *Lett.* **23**, 283–292 (2020).
- 640 16. Pitnick, S., Hosken, D. J. & Birkhead, T. R. Sperm morphological diversity. in *Sperm*  
641 *Biology* 69–149 (Academic Press, 2009). doi:10.1016/B978-0-12-372568-4.00003-3
- 642 17. Birkhead, T. & Møller, A. P. (Anders P. *Sperm competition and sexual selection*.  
643 (Academic Press, 1998).
- 644 18. Simmons, L. W. & Fitzpatrick, J. L. Sperm wars and the evolution of male fertility.

- 645            *Reproduction* **144**, (2012).
- 646 19.    Lüpold, S., de Boer, R. A., Evans, J. P., Tomkins, J. L. & Fitzpatrick, J. L. How sperm  
647            competition shapes the evolution of testes and sperm: a meta-analysis. *Philos. Trans.*  
648            *R. Soc. B Biol. Sci.* **375**, 20200064 (2020).
- 649 20.    Eberhard, W. *Female Control*. (Princeton University Press, 1996).  
650            doi:10.1515/9780691207209
- 651 21.    Birkhead, T. R. Cryptic female choice: Criteria for establishing female sperm choice.  
652            *Evolution (N. Y.)*. **52**, (1998).
- 653 22.    Firman, R. C., Gasparini, C., Manier, M. K. & Pizzari, T. Postmating Female Control: 20  
654            Years of Cryptic Female Choice. *Trends in Ecology and Evolution* **32**, 368–382 (2017).
- 655 23.    Pizzari, T. & Birkhead, T. R. Female feral fowl eject sperm of subdominant males.  
656            *Nature* **405**, (2000).
- 657 24.    Gasparini, C., Pilastro, A. & Evans, J. P. The role of female reproductive fluid in sperm  
658            competition. *Philos. Trans. R. Soc. B Biol. Sci.* **375**, 20200077 (2020).
- 659 25.    Fitzpatrick, J. L. *et al.* Female promiscuity promotes the evolution of faster sperm in  
660            cichlid fishes. *Proc. Natl. Acad. Sci. U. S. A.* **106**, 1128–32 (2009).
- 661 26.    Bonilla, E. & Xu, E. Y. Identification and characterization of novel mammalian  
662            spermatogenic genes conserved from fly to human. *Mol. Hum. Reprod.* **14**, 137–142  
663            (2008).
- 664 27.    Rolland, A. D. *et al.* Expression profiling of rainbow trout testis development identifies  
665            evolutionary conserved genes involved in spermatogenesis. *BMC Genomics* **10**, 546  
666            (2009).
- 667 28.    Gunes, S., Al-Sadaan, M. & Agarwal, A. Spermatogenesis, DNA damage and DNA  
668            repair mechanisms in male infertility. *Reprod. Biomed. Online* **31**, 309–319 (2015).

- 669 29. Bloom, J. C., Loehr, A. R., Schimenti, J. C. & Weiss, R. S. Germline genome protection:  
670 implications for gamete quality and germ cell tumorigenesis. *Andrology* **7**, andr.12651  
671 (2019).
- 672 30. Serrato-Capuchina, A. & Matute, D. R. The role of transposable elements in  
673 speciation. *Genes* **9**, 254 (2018).
- 674 31. McDermott, S. R. & Noor, M. A. F. The role of meiotic drive in hybrid male sterility.  
675 *Philos. Trans. R. Soc. B Biol. Sci.* **365**, 1265–1272 (2010).
- 676 32. Chintalapati, M. & Moorjani, P. Evolution of the mutation rate across primates.  
677 *Current Opinion in Genetics and Development* **62**, 58–64 (2020).
- 678 33. Wolgemuth, D. J., Laurion, E. & Lele, K. M. *Regulation of the Mitotic and Meiotic Cell*  
679 *Cycles in the Male Germ Line.* (2002).
- 680 34. Larson, E. L., Kopania, E. E. K. & Good, J. M. Spermatogenesis and the Evolution of  
681 Mammalian Sex Chromosomes. *Trends in Genetics* **34**, 722–732 (2018).
- 682 35. Stockley, P. Sexual conflict resulting from adaptations to sperm competition. *Trends*  
683 *Ecol. Evol.* **12**, 154–159 (1997).
- 684 36. Gavrillets, S. Rapid evolution of reproductive barriers driven by sexual conflict. *Nature*  
685 **403**, 886–889 (2000).
- 686 37. Parker, G. . Sexual conflict over mating and fertilization: an overview. *Philos. Trans. R.*  
687 *Soc. B Biol. Sci.* **361**, 235–259 (2006).
- 688 38. Hermann, B. P. *et al.* The Mammalian Spermatogenesis Single-Cell Transcriptome,  
689 from Spermatogonial Stem Cells to Spermatids. *Cell Rep.* **25**, 1650-1667.e8 (2018).
- 690 39. Lau, X., Munusamy, P., Ng, M. J. & Sangrithi, M. Single-Cell RNA Sequencing of the  
691 Cynomolgus Macaque Testis Reveals Conserved Transcriptional Profiles during  
692 Mammalian Spermatogenesis. *Dev. Cell* **54**, 548-566.e7 (2020).



- 693 40. Shami, A. N. *et al.* Single-Cell RNA Sequencing of Human, Macaque, and Mouse Testes  
694 Uncovers Conserved and Divergent Features of Mammalian Spermatogenesis. *Dev.*  
695 *Cell* **54**, 529-547.e12 (2020).
- 696 41. Suzuki, S., Diaz, V. D. & Hermann, B. P. What has single-cell RNA-seq taught us about  
697 mammalian spermatogenesis? *Biology of Reproduction* **101**, 617–634 (2019).
- 698 42. Green, C. D. *et al.* A Comprehensive Roadmap of Murine Spermatogenesis Defined by  
699 Single-Cell RNA-Seq. *Dev. Cell* **46**, 651-667.e10 (2018).
- 700 43. Handel, M. A. The XY body: a specialized meiotic chromatin domain. *Exp. Cell Res.*  
701 **296**, 57–63 (2004).
- 702 44. Kousathanas, A., Halligan, D. L. & Keightley, P. D. Faster-X Adaptive Protein Evolution  
703 in House Mice. *Genetics* **196**, 1131–1143 (2014).
- 704 45. Aire, T. A. Spermatogenesis and Spermiogenesis, Birds. in *Encyclopedia of*  
705 *Reproduction* 313–320 (Elsevier, 2018). doi:10.1016/B978-0-12-809633-8.20573-6
- 706 46. Lin, M. & Jones, R. C. Renewal and proliferation of spermatogonia during  
707 spermatogenesis in the Japanese quail, *Coturnix coturnix japonica*. *Cell Tissue Res.*  
708 **267**, 591–601 (1992).
- 709 47. Pudney, J. Spermatogenesis in nonmammalian vertebrates. *Microsc. Res. Tech.* **32**,  
710 459–497 (1995).
- 711 48. Turner, J. M. A. *et al.* Silencing of unsynapsed meiotic chromosomes in the mouse.  
712 *Nat. Genet.* **37**, 41–47 (2005).
- 713 49. Qvarnström, A., Rice, A. M. & Ellegren, H. Speciation in *Ficedula* flycatchers. in  
714 *Philosophical Transactions of the Royal Society B: Biological Sciences* **365**, 1841–1852  
715 (The Royal Society, 2010).
- 716 50. Alund, M., Immler, S., Rice, A. M. & Qvarnstrom, A. Low fertility of wild hybrid male

- 717 flycatchers despite recent divergence. *Biol. Lett.* **9**, 20130169 (2013).
- 718 51. Cramer, E. R. A., Ålund, M., McFarlane, S. E., Johnsen, A. & Qvarnström, A. Females  
719 discriminate against heterospecific sperm in a natural hybrid zone. *Evolution* **70**,  
720 1844–1855 (2016).
- 721 52. Sangrithi, M. N. & Turner, J. M. A. Mammalian X Chromosome Dosage Compensation:  
722 Perspectives From the Germ Line. *BioEssays* **40**, 1800024 (2018).
- 723 53. Mank, J. E. & Ellegren, H. All dosage compensation is local: Gene-by-gene regulation  
724 of sex-biased expression on the chicken Z chromosome. *Heredity (Edinb)*. **102**, 312–  
725 320 (2009).
- 726 54. Uebbing, S., Künstner, A., Mäkinen, H. & Ellegren, H. Transcriptome Sequencing  
727 Reveals the Character of Incomplete Dosage Compensation across Multiple Tissues in  
728 Flycatchers. *Genome Biol. Evol.* **5**, 1555–1566 (2013).
- 729 55. Larson, E. L. *et al.* Contrasting levels of molecular evolution on the mouse X  
730 chromosome. *Genetics* **203**, 1841–1857 (2016).
- 731 56. Emerson, J. J., Kaessmann, H., Betrán, E. & Long, M. Extensive Gene Traffic on the  
732 Mammalian X Chromosome. *Science (80-. )*. **303**, 537–540 (2004).
- 733 57. Zhang, Y. E., Vibranovski, M. D., Landback, P., Marais, G. A. B. & Long, M.  
734 Chromosomal Redistribution of Male-Biased Genes in Mammalian Evolution with Two  
735 Bursts of Gene Gain on the X Chromosome. *PLoS Biol.* **8**, e1000494 (2010).
- 736 58. Long Jiang, A. *et al.* RPL10L Is Required for Male Meiotic Division by Compensating for  
737 RPL10 during Meiotic Sex Chromosome Inactivation in Mice. *Curr. Biol.* **27**, 1498-  
738 1505.e6 (2017).
- 739 59. da Cruz, I. *et al.* Transcriptome analysis of highly purified mouse spermatogenic cell  
740 populations: gene expression signatures switch from meiotic-to postmeiotic-related

- 741 processes at pachytene stage. *BMC Genomics* **17**, 294 (2016).
- 742 60. Ellegren, H. & Parsch, J. The evolution of sex-biased genes and sex-biased gene  
743 expression. *Nat. Rev. Genet.* **8**, 689–698 (2007).
- 744 61. Wang, Z. *et al.* Temporal genomic evolution of bird sex chromosomes. *BMC Evol. Biol.*  
745 **14**, 250 (2014).
- 746 62. Rice, W. R. Sex Chromosomes and the Evolution of Sexual Dimorphism. *Evolution (N.*  
747 *Y)*. **38**, 735 (1984).
- 748 63. Irwin, D. E. Sex chromosomes and speciation in birds and other ZW systems. *Mol.*  
749 *Ecol.* **27**, 3831–3851 (2018).
- 750 64. Dean, R., Harrison, P. W., Wright, A. E., Zimmer, F. & Mank, J. E. Positive Selection  
751 Underlies Faster-Z Evolution of Gene Expression in Birds. *Mol. Biol. Evol.* **32**, 2646–  
752 2656 (2015).
- 753 65. Ellegren, H. *et al.* The genomic landscape of species divergence in Ficedula  
754 flycatchers. *Nature* **491**, 756–760 (2012).
- 755 66. Price, T. *Speciation in birds*. (W. H. Freeman, 2008).
- 756 67. Janoušek, V. *et al.* Postcopulatory sexual selection reduces Z-linked genetic variation  
757 and might contribute to the large Z effect in passerine birds. *Heredity (Edinb)*. **122**,  
758 622–635 (2019).
- 759 68. Mank, J. E., Axelsson, E. & Ellegren, H. Fast-X on the Z: Rapid evolution of sex-linked  
760 genes in birds. *Genome Res.* **17**, 618–624 (2007).
- 761 69. McFarlane, S. E., Sirkiä, P. M., Ålund, M. & Qvarnström, A. Hybrid dysfunction  
762 expressed as elevated metabolic rate in male ficedula flycatchers. *PLoS One* **11**,  
763 e0161547 (2016).
- 764 70. Jones, R. C. & Lin, M. Spermatogenesis in birds. *Oxford reviews of reproductive*

- 765 *biology* **15**, 233–264 (1993).
- 766 71. Zheng, G. X. Y. *et al.* Massively parallel digital transcriptional profiling of single cells.  
767 *Nat. Commun.* **8**, 14049 (2017).
- 768 72. La Manno, G. *et al.* RNA velocity of single cells. *Nature* **560**, 494–498 (2018).
- 769 73. Stuart, T. *et al.* Comprehensive Integration of Single-Cell Data. *Cell* **177**, 1888-  
770 1902.e21 (2019).
- 771 74. Ge, S. X., Jung, D. & Yao, R. ShinyGO: a graphical gene-set enrichment tool for animals  
772 and plants. *Bioinformatics* **36**, 2628–2629 (2020).
- 773 75. Supek, F., Bošnjak, M., Škunca, N. & Šmuc, T. REVIGO Summarizes and Visualizes Long  
774 Lists of Gene Ontology Terms. *PLoS One* **6**, e21800 (2011).
- 775 76. Bergen, V., Lange, M., Peidli, S., Wolf, F. A. & Theis, F. J. Generalizing RNA velocity to  
776 transient cell states through dynamical modeling. *Nat. Biotechnol.* **38**, 1408–1414  
777 (2020).
- 778 77. Wolf, F. A. *et al.* PAGA: graph abstraction reconciles clustering with trajectory  
779 inference through a topology preserving map of single cells. *Genome Biol.* **20**, 59  
780 (2019).
- 781 78. Bolívar, P., Mugal, C. F., Nater, A. & Ellegren, H. Recombination Rate Variation  
782 Modulates Gene Sequence Evolution Mainly via GC-Biased Gene Conversion, Not Hill–  
783 Robertson Interference, in an Avian System. *Mol. Biol. Evol.* **33**, 216–227 (2016).

784

785

## 786 **Tables**

787 Table 1. Numbers of differentially expressed (DE) genes and non-differentially expressed

788 (non-DE) genes between collared and pied flycatchers per cluster for autosome genes and Z-  
 789 linked genes. Mitochondrial DE genes and DE genes with unknown position in the genome  
 790 were excluded from this particular analysis.

| Stage          | Cluster | Autosomes |        | Z Chromosome |        | P-value        |
|----------------|---------|-----------|--------|--------------|--------|----------------|
|                |         | DE        | non DE | DE           | non DE |                |
| Somatic cells  | 17      | 0         | 2508   | 0            | 113    | 1              |
| Somatic cells  | 11      | 0         | 689    | 0            | 43     | 1              |
| Somatic cells  | 5       | 0         | 693    | 0            | 37     | 1              |
| Somatic cells  | 16      | 0         | 2352   | 0            | 133    | 1              |
| Somatic cells  | 12      | 0         | 1235   | 0            | 68     | 1              |
| Spermatogonia  | 10      | 1         | 929    | 0            | 43     | 1              |
| Spermatogonia  | 9       | 2         | 818    | 0            | 40     | 1              |
| Meiosis stages | 15      | 0         | 1852   | 0            | 83     | 1              |
| Meiosis stages | 13      | 0         | 1759   | 0            | 85     | 1              |
| Meiosis stages | 0       | 36        | 354    | 8            | 12     | <b>0.00044</b> |
| Meiosis stages | 8       | 5         | 767    | 0            | 35     | 1              |
| Meiosis stages | 3       | 39        | 541    | 4            | 35     | 0.2827         |
| Spermatids     | 6       | 104       | 348    | 9            | 16     | 0.1092         |
| Spermatids     | 1       | 215       | 397    | 12           | 23     | 0.6057         |
| Spermatids     | 14      | 1         | 993    | 0            | 46     | 1              |
| Spermatids     | 2       | 44        | 657    | 6            | 41     | 0.085          |
| Spermatids     | 4       | 32        | 497    | 4            | 26     | 0.119          |
| Spermatids     | 7       | 19        | 1160   | 1            | 50     | 0.5742         |

791

792

793

794

795

796 **Table 2. DE genes related to cellular respiration and cell motility.** Subset of DE genes between collared and pied flycatchers located on the  
797 mitochondrial chromosome and on either the Z-chromosome or autosomes but coding for mitochondrial proteins.

| Gene name | Ensembl Gene ID    | Gene Type      | Chr. | Description                                                                               | DE in cluster            |
|-----------|--------------------|----------------|------|-------------------------------------------------------------------------------------------|--------------------------|
|           |                    |                |      |                                                                                           | 3,4,1,6,0,2,8,9,10,<br>5 |
| nad2      | ENSFALG00000016231 | Mt_rRNA        | MT   | mt rna                                                                                    | 5                        |
|           | ENSFALG00000016239 | protein_coding | MT   | Nadh dehydrogenase subunit 2                                                              | 3,1,0,2                  |
| cox2      | ENSFALG00000016248 | protein_coding | MT   | Cytochrome c oxidase subunit ii                                                           | 3,1,6,0,2,9              |
| atp6      | ENSFALG00000016251 | protein_coding | MT   | Atp synthase f0 subunit 6                                                                 | 3,4,1,6,0,2,9            |
| cox3      | ENSFALG00000016252 | protein_coding | MT   | Cytochrome c oxidase subunit iii                                                          | 3,4,1,6,0,2,8,9,5        |
| cytb      | ENSFALG00000016262 | protein_coding | MT   | Cytochrome b                                                                              | 3,1,6,0,2                |
| ND6       | ENSFALG00000016265 | protein_coding | MT   | Nadh dehydrogenase subunit 6                                                              | 3,0                      |
| SPEF2     | ENSFALG00000002091 | protein_coding | Z    | Sperm flagellar 2. Axoneme and correct sperm head formation. ortholog: SERF1A Small EDRK- | 3                        |
|           | ENSFALG00000012304 | protein_coding | Z    | Rich Factor 1A                                                                            | 3,0                      |
| ACO1      | ENSFALG00000001167 | protein_coding | Z    | aconitase 1 iron sensor                                                                   | 3,1,2                    |
|           |                    |                |      | Nadh:ubiquinone                                                                           |                          |
| NDUFS4    | ENSFALG00000010767 | protein_coding | Z    | oxidoreductase subunit s4                                                                 | 4                        |
|           |                    |                |      | Mitochondrial creatine kinase (MtCK)                                                      |                          |
| CKMT2     | ENSFALG00000012745 | protein_coding | Z    | (MtCK)                                                                                    | 4,6                      |
|           | ENSFALG00000016233 | Mt_rRNA        | MT   | mt rna                                                                                    | 1,0                      |
| nad1      | ENSFALG00000016235 | protein_coding | MT   | Nadh dehydrogenase subunit 1                                                              | 1,0                      |
| cox1      | ENSFALG00000016245 | protein_coding | MT   | Cytochrome c oxidase subunit i                                                            | 1                        |
| nad5      | ENSFALG00000016261 | protein_coding | MT   | Nadh dehydrogenase subunit 5                                                              | 1,0                      |
| UBAP2     | ENSFALG00000009935 | protein_coding | Z    | ubiquitin associated protein                                                              | 1                        |
|           |                    |                |      | Fch and mu domain containing                                                              |                          |
| TMEM171   | ENSFALG00000010257 | protein_coding | Z    | endocytic adaptor 2                                                                       | 1                        |

|         |                    |                |   |                                                     |           |   |
|---------|--------------------|----------------|---|-----------------------------------------------------|-----------|---|
| TMEM174 | ENSFALG00000010257 | protein_coding | Z | Fch and mu domain containing<br>endocytic adaptor 2 |           | 1 |
|         | ENSFALG00000005259 | protein_coding | Z | chaperone post translational<br>modification        | 1,6       |   |
| RPS23   | ENSFALG00000012668 | protein_coding | Z | ribosomal protein                                   |           | 1 |
| SSBP2   | ENSFALG00000012689 | protein_coding | Z | single strand binding protein                       | 1,6,0     |   |
| RPL37   | ENSFALG00000002006 | protein_coding | Z | ribosomal protein                                   |           | 6 |
| PAX5    | ENSFALG00000012983 | protein_coding | Z | Paired box 5, transcription<br>factor.              |           | 6 |
|         | ENSFALG00000010043 | protein_coding | Z | POC5 centrosomal protein,<br>involved in cell cycle |           | 0 |
| CKS2    | ENSFALG00000012438 | protein_coding | Z | Cdc28 protein kinase regulatory<br>subunit 2        |           | 0 |
| SETD9   | ENSFALG00000010986 | protein_coding | Z | Set domain containing 9                             |           | 2 |
| DNAJA1  | ENSFALG00000001223 | protein_coding | Z | heat shock protein                                  |           | 2 |
| MRPL57  | ENSFALG00000014840 | protein_coding | 1 | Mitochondrial ribosomal protein<br>I57              | 6,1,2,4,7 |   |
|         |                    |                |   | Mitochondrial fission regulator                     |           |   |
| MTFR1   | ENSFALG00000005475 | protein_coding | 2 | 1                                                   |           | 1 |
| MFN1    | ENSFALG00000008386 | protein_coding | 9 | Mitofusin 1                                         |           | 1 |
